# Supplementary material for: Peptide-Functionalized Nanoemulsions as a Promising Tool for Isolation and Ex Vivo Culture of Circulating Tumor Cells
Source: MDPI journal article supplement (doi:10.3390/bioengineering9080380), 2022-08-10
Supplement: s1 [file s1]

Communication

# Peptide-Functionalized Nanoemulsions as a Promising Tool for Isolation and Ex Vivo Culture of Circulating Tumor Cells

Nuria Carmona-Ule <sup>1</sup>, Noga Gal <sup>2</sup>, Carmen Abuín Redondo <sup>1,3</sup>, María De La Fuente Freire <sup>4,5,6</sup>, Rafael López López <sup>1,3,4,6\*</sup> and Ana Belén Dávila-Ibáñez <sup>1,3,4\*</sup>

<sup>1</sup> Roche-Chus Joint Unit, Translational Medical Oncology Group (Oncomet), Health Research Institute of Santiago de Compostela (IDIS), Hospital Gil Casares, 15706 Santiago de Compostela, Spain; nuria.carmona.ule@gmail.com (N.C.-U.); carmen.abuin.redondo@sergas.es (C.A.R.); rafael.lopez.lopez@sergas.es (R.L.L.)

<sup>2</sup> Interdisciplinary Nanoscience Center (iNANO), Aarhus University, 8000 Aarhus, Denmark; noga@inano.au.dk

<sup>3</sup> Translational Medical Oncology Group (Oncomet), Health Research Institute of Santiago de Compostela (IDIS), University Clinical Hospital of Santiago de Compostela (SERGAS), 15706 Santiago de Compostela, Spain

<sup>4</sup> Cancer Network Research (CIBERONC), 28029 Madrid, Spain; maria.de.la.fuente.freire@sergas.es

<sup>5</sup> Nano-Oncology Unit, Health Research Institute of Santiago de Compostela (IDIS), SERGAS, 15706 Santiago de Compostela, Spain

<sup>6</sup> DIVERSA Technologies S.L., 15782 Santiago de Compostela, Spain

\* Correspondence: ana.belen.davila.ibanez@sergas.es

**Supplementary Materials:** The following are available online at [www.mdpi.com/xxx/s1](http://www.mdpi.com/xxx/s1), Figure S1: Analysis of final concentration in Pep10-NEs and GE11-NEs formulations, Figure S2: Analysis of the stability after storage for 3 months at 4 °C, particle size, Pdl and ζ-Potential values for Pep10-NEs and GE11.

**A**

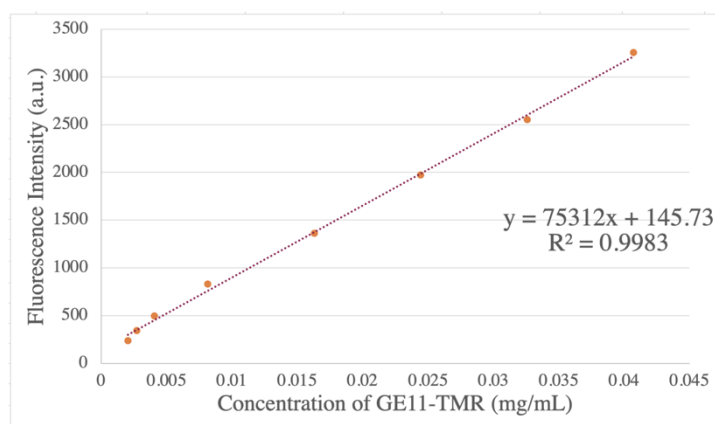

| GE11(TMR) in 1mL formulation     |             |             |             |             |
|----------------------------------|-------------|-------------|-------------|-------------|
| Concentration added GE11 (mg/mL) |             |             |             |             |
| 0.0163                           |             |             |             |             |
|                                  | n1          | n2          | n3          | n4          |
| Concentration1                   | 0.005208599 | 0.003376222 | 0.003522281 | 0.004265854 |
| Concentration2                   | 0.005248433 | 0.003442612 | 0.00373473  | 0.004199464 |
| Concentration3                   | 0.004929759 | 0.003137216 | 0.003588671 | 0.003880789 |
| Average                          | 0.00512893  | 0.003318683 | 0.003615227 | 0.004115369 |
|                                  | 0.004044552 |             |             |             |

**B**

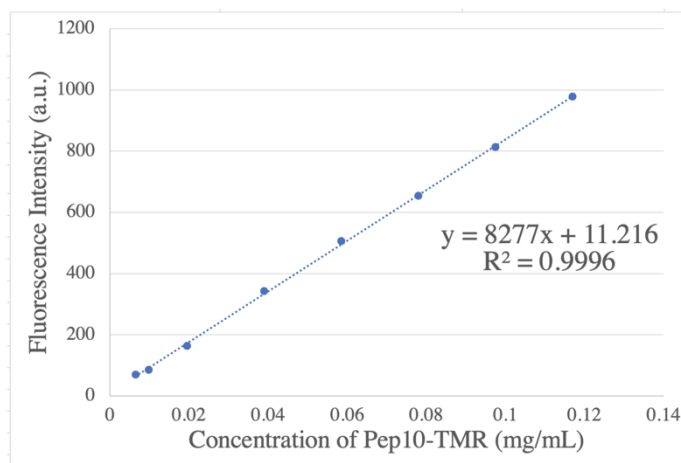

| Pep10(TMR) in 1mL formulation     |             |             |             |             |
|-----------------------------------|-------------|-------------|-------------|-------------|
| Concentration added Pep10 (mg/mL) |             |             |             |             |
| 0.0195                            |             |             |             |             |
|                                   | n1          | n2          | n3          | n4          |
| Concentration1                    | 0.008793524 | 0.009518425 | 0.009880875 | 0.009155974 |
| Concentration2                    | 0.008914341 | 0.009035158 | 0.010243325 | 0.008914341 |
| Concentration3                    | 0.009397608 | 0.009155974 | 0.009397608 | 0.009035158 |
| Average                           | 0.009035158 | 0.009236519 | 0.009840602 | 0.009035158 |
|                                   | 0.009286859 |             |             |             |

**Figure S1.** Analysis of final concentration in Pep10-NEs and GE11-NEs formulations.

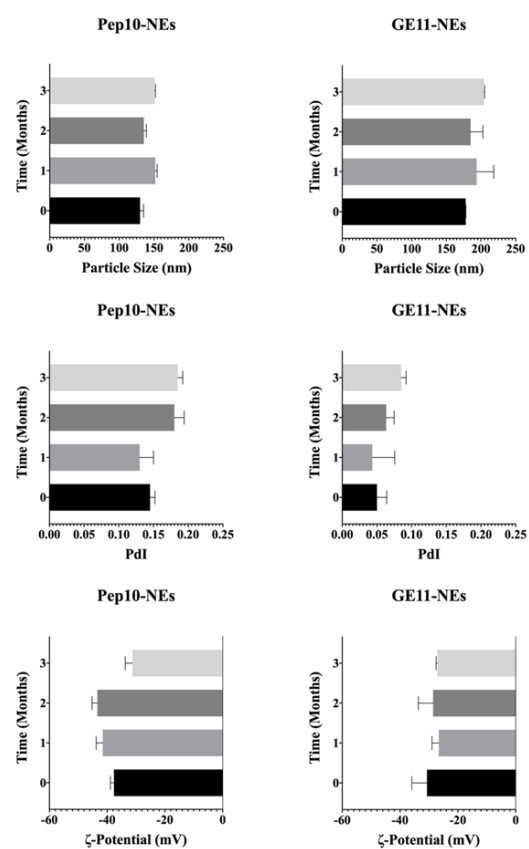

**Figure S2.** Analysis of the stability after storage for 3 months at 4 °C, particle size, Pdl and ζ-Poten-tial values for Pep10-NEs and GE11.
